# Supplementary material
Source: PubMed Central journal article supplement (PMC3679353)

# Suppl. Figure 1

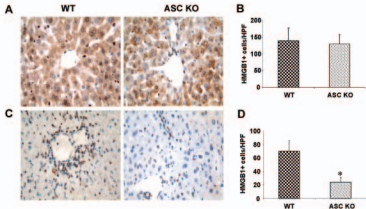

## Suppl. Figure 2

**A**

ASC KO (ischemia)

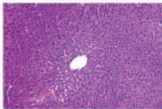

ASC KO (ischemia/reperfusion)

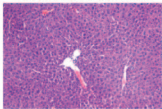

**B**

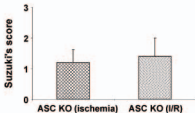

# Suppl. Figure 3

## A

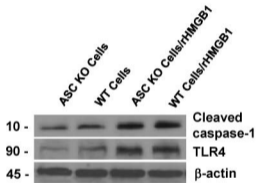

## B

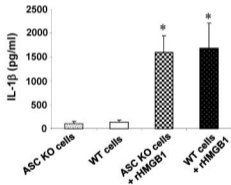

# Suppl. Figure 4

**A**

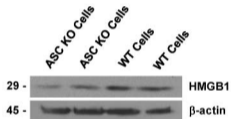

**B**

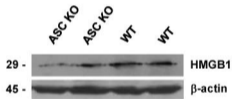

# Suppl. Figure 5

**A**

WT + rHMGB1

Sham + rHMGB1

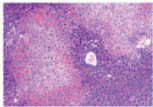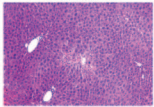

**B**

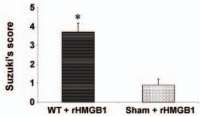

Supplement: NIHMS447063-supplement-Supp_Fig_S1-S5.pdf [file NIHMS447063-supplement-Supp_Fig_S1-S5.pdf]
